# Supplementary material for: The Efficiency of Spa Rehabilitation in Chronic Ischemic Stroke Patients—Preliminary Reports
Source: MDPI journal article supplement (doi:10.3390/brainsci11040501), 2021-04-15
Supplement: s1 [file s1]

Table S1. The effects of the rehabilitation program relative to age, sex and time from stroke onset

|               |                                                    | Sex    |      |       |      | p     | Age       |      |                   |      | p     | Time from stroke |      |             |      | p            |
|---------------|----------------------------------------------------|--------|------|-------|------|-------|-----------|------|-------------------|------|-------|------------------|------|-------------|------|--------------|
|               |                                                    | Female |      | Male  |      |       | <65 years |      | 65 years and over |      |       | 1-5 years        |      | >5-10 years |      |              |
|               |                                                    | Mean   | SD   | Mean  | SD   |       | Mean      | SD   | Mean              | SD   |       | Mean             | SD   | Mean        | SD   |              |
| WHOQOL-Bref   |                                                    |        |      |       |      |       |           |      |                   |      |       |                  |      |             |      |              |
| Effect I      | Individual general perception of quality of life   | 0.31   | 0.48 | 0.31  | 0.48 | 1.000 | 0.46      | 0.52 | 0.21              | 0.42 | 0.161 | 0.46             | 0.52 | 0.21        | 0.42 | 0.161        |
|               | Individual general perception of quality of health | 0.56   | 0.51 | 0.69  | 0.60 | 0.532 | 0.77      | 0.44 | 0.53              | 0.61 | 0.201 | 0.85             | 0.38 | 0.47        | 0.61 | <b>0.041</b> |
|               | Somatic                                            | 9.38   | 4.36 | 10.50 | 6.03 | 0.550 | 11.46     | 5.72 | 8.89              | 4.70 | 0.175 | 12.00            | 5.60 | 8.53        | 4.55 | 0.063        |
|               | Psychological                                      | 9.13   | 7.46 | 10.00 | 6.45 | 0.725 | 9.38      | 7.19 | 9.68              | 6.84 | 0.906 | 11.38            | 5.91 | 8.32        | 7.35 | 0.220        |
|               | Social                                             | 8.25   | 6.21 | 5.69  | 6.68 | 0.270 | 5.54      | 3.84 | 7.95              | 7.74 | 0.255 | 4.92             | 4.05 | 8.37        | 7.50 | 0.104        |
|               | Environmental                                      | 6.38   | 4.50 | 7.31  | 4.64 | 0.566 | 7.62      | 4.52 | 6.32              | 4.57 | 0.434 | 7.85             | 4.51 | 6.16        | 4.52 | 0.307        |
| Effect II     | Individual general perception of quality of life   | 0.07   | 0.83 | 0.14  | 0.53 | 0.789 | 0.25      | 0.62 | 0.00              | 0.73 | 0.349 | 0.33             | 0.49 | -0.06       | 0.77 | 0.133        |
|               | Individual general perception of quality of health | 0.43   | 0.76 | 0.57  | 0.65 | 0.596 | 0.58      | 0.67 | 0.44              | 0.73 | 0.592 | 0.67             | 0.49 | 0.38        | 0.81 | 0.279        |
|               | Somatic                                            | 0.50   | 5.02 | 3.93  | 5.20 | 0.087 | 2.42      | 6.54 | 2.06              | 4.39 | 0.873 | 2.42             | 6.54 | 2.06        | 4.39 | 0.873        |
|               | Psychological                                      | 1.14   | 7.40 | 6.29  | 7.54 | 0.080 | 2.50      | 6.82 | 4.63              | 8.54 | 0.485 | 3.17             | 6.73 | 4.13        | 8.69 | 0.754        |
|               | Social                                             | 4.79   | 7.86 | 1.21  | 7.08 | 0.218 | 2.00      | 4.97 | 3.75              | 9.13 | 0.523 | 0.67             | 5.35 | 4.75        | 8.62 | 0.136        |
|               | Environmental                                      | 2.79   | 3.98 | 3.00  | 3.53 | 0.881 | 4.25      | 3.49 | 1.88              | 3.61 | 0.093 | 3.75             | 3.65 | 2.25        | 3.71 | 0.296        |
| Effect III    | Individual general perception of quality of life   | -0.29  | 0.47 | -0.14 | 0.36 | 0.376 | -0.17     | 0.39 | -0.25             | 0.45 | 0.611 | -0.08            | 0.29 | -0.31       | 0.48 | 0.129        |
|               | Individual general perception of quality of health | -0.14  | 0.36 | -0.21 | 0.43 | 0.637 | -0.25     | 0.45 | -0.13             | 0.34 | 0.412 | -0.25            | 0.45 | -0.13       | 0.34 | 0.412        |
|               | Somatic                                            | -8.86  | 4.28 | -6.21 | 3.98 | 0.103 | -9.08     | 3.90 | -6.38             | 4.29 | 0.098 | -9.67            | 4.08 | -5.94       | 3.79 | <b>0.019</b> |
|               | Psychological                                      | -7.43  | 5.87 | -4.00 | 3.14 | 0.068 | -7.25     | 5.82 | -4.56             | 3.97 | 0.158 | -8.58            | 4.74 | -3.56       | 3.98 | <b>0.005</b> |
|               | Social                                             | -3.50  | 7.05 | -3.50 | 5.36 | 1.000 | -3.33     | 4.12 | -3.63             | 7.45 | 0.904 | -4.08            | 5.60 | -3.06       | 6.67 | 0.672        |
|               | Environmental                                      | -3.00  | 2.35 | -3.86 | 3.42 | 0.446 | -3.00     | 2.22 | -3.75             | 3.38 | 0.485 | -3.75            | 2.60 | -3.19       | 3.19 | 0.622        |
| Index Barthel |                                                    |        |      |       |      |       |           |      |                   |      |       |                  |      |             |      |              |
| Effect I      | Eating meals                                       | 1.88   | 2.50 | 1.25  | 2.24 | 0.462 | 1.92      | 2.53 | 1.32              | 2.26 | 0.483 | 1.92             | 2.53 | 1.32        | 2.26 | 0.483        |
|               | Moving from bed to chair and back                  | 0.94   | 2.02 | 1.25  | 2.24 | 0.681 | 1.54      | 2.40 | 0.79              | 1.87 | 0.330 | 1.54             | 2.40 | 0.79        | 1.87 | 0.330        |
|               | Maintaining personal hygiene                       | 1.25   | 2.24 | 1.56  | 2.39 | 0.705 | 1.92      | 2.53 | 1.05              | 2.09 | 0.297 | 1.92             | 2.53 | 1.05        | 2.09 | 0.297        |
|               | Using the toilet                                   | 1.56   | 2.39 | 1.25  | 2.24 | 0.705 | 1.15      | 2.19 | 1.58              | 2.39 | 0.613 | 0.77             | 1.88 | 1.84        | 2.48 | 0.174        |
|               | Bathing, washing the whole body                    | 0.31   | 1.25 | 0.00  | 0.00 | 0.333 | 0.00      | 0.00 | 0.26              | 1.15 | 0.417 | 0.00             | 0.00 | 0.26        | 1.15 | 0.417        |
|               | Moving on flat surfaces                            | 2.50   | 2.58 | 2.50  | 2.58 | 1.000 | 3.08      | 2.53 | 2.11              | 2.54 | 0.295 | 3.08             | 2.53 | 2.11        | 2.54 | 0.295        |
|               | Going up and down stairs                           | 2.19   | 2.56 | 2.19  | 2.56 | 1.000 | 2.69      | 2.59 | 1.84              | 2.48 | 0.357 | 2.31             | 2.59 | 2.11        | 2.54 | 0.828        |
|               | Dressing and undressing                            | 0.31   | 1.25 | 1.25  | 2.24 | 0.156 | 0.38      | 1.39 | 1.05              | 2.09 | 0.286 | 0.77             | 1.88 | 0.79        | 1.87 | 0.976        |
|               | Controlling urine excretion                        | 0.00   | 0.00 | 0.00  | 1.83 | 1.000 | 0.00      | 0.00 | 0.00              | 1.67 | 1.000 | 0.00             | 0.00 | 0.00        | 1.67 | 1.000        |
|               | Controlling stool excretion                        | 0.00   | 0.00 | 0.31  | 1.25 | 0.333 | 0.00      | 0.00 | 0.26              | 1.15 | 0.417 | 0.00             | 0.00 | 0.26        | 1.15 | 0.417        |
|               | Total Index Barthel                                | 10.94  | 6.64 | 11.56 | 8.31 | 0.816 | 12.69     | 7.53 | 10.26             | 7.35 | 0.371 | 12.31            | 8.07 | 10.53       | 7.05 | 0.513        |
| Effect II     | Eating meals                                       | 1.43   | 2.34 | 1.07  | 2.13 | 0.676 | 1.67      | 2.46 | 0.94              | 2.02 | 0.397 | 1.67             | 2.46 | 0.94        | 2.02 | 0.397        |
|               | Moving from bed to chair and back                  | 0.71   | 1.82 | 0.36  | 1.34 | 0.558 | 1.25      | 2.26 | 0.00              | 0.00 | 0.082 | 1.25             | 2.26 | 0.00        | 0.00 | 0.082        |
|               | Maintaining personal hygiene                       | 1.07   | 2.13 | 0.71  | 1.82 | 0.637 | 1.67      | 2.46 | 0.31              | 1.25 | 0.101 | 1.67             | 2.46 | 0.31        | 1.25 | 0.101        |
|               | Using the toilet                                   | 1.07   | 2.13 | 1.07  | 2.13 | 1.000 | 1.25      | 2.26 | 0.94              | 2.02 | 0.703 | 0.83             | 1.95 | 1.25        | 2.24 | 0.611        |

|            |                                   |       |      |       |      |       |       |      |       |      |              |       |      |       |      |              |
|------------|-----------------------------------|-------|------|-------|------|-------|-------|------|-------|------|--------------|-------|------|-------|------|--------------|
|            | Bathing, washing the whole body   | 0.00  | 0.00 | 0.00  | 0.00 |       | 0.00  | 0.00 | 0.00  | 0.00 |              | 0.00  | 0.00 | 0.00  | 0.00 |              |
|            | Moving on flat surfaces           | 2.86  | 2.57 | 1.79  | 2.49 | 0.272 | 2.92  | 2.57 | 1.88  | 2.50 | 0.291        | 2.92  | 2.57 | 1.88  | 2.50 | 0.291        |
|            | Going up and down stairs          | 1.79  | 2.49 | 1.43  | 2.34 | 0.699 | 2.50  | 2.61 | 0.94  | 2.02 | 0.100        | 2.08  | 2.57 | 1.25  | 2.24 | 0.369        |
|            | Dressing and undressing           | 0.36  | 1.34 | 1.07  | 2.13 | 0.299 | 0.42  | 1.44 | 0.94  | 2.02 | 0.454        | 0.83  | 1.95 | 0.63  | 1.71 | 0.766        |
|            | Controlling urine excretion       | 0.00  | 0.00 | 0.00  | 1.96 | 1.000 | 0.00  | 0.00 | 0.00  | 1.83 | 1.000        | 0.00  | 0.00 | 0.00  | 1.83 | 1.000        |
|            | Controlling stool excretion       | 0.00  | 0.00 | 0.00  | 0.00 |       | 0.00  | 0.00 | 0.00  | 0.00 |              | 0.00  | 0.00 | 0.00  | 0.00 |              |
|            | Total Index Barthel               | 9.29  | 6.16 | 6.79  | 6.68 | 0.313 | 11.67 | 6.85 | 5.31  | 4.64 | <b>0.007</b> | 11.25 | 7.42 | 5.63  | 4.43 | <b>0.032</b> |
| Effect III | Eating meals                      | 0.00  | 0.00 | 0.00  | 0.00 |       | 0.00  | 0.00 | 0.00  | 0.00 |              | 0.00  | 0.00 | 0.00  | 0.00 |              |
|            | Moving from bed to chair and back | 0.00  | 0.00 | -0.71 | 1.82 | 0.165 | 0.00  | 0.00 | -0.63 | 1.71 | 0.164        | 0.00  | 0.00 | -0.63 | 1.71 | 0.164        |
|            | Maintaining personal hygiene      | 0.00  | 0.00 | -0.36 | 1.34 | 0.336 | 0.00  | 0.00 | -0.31 | 1.25 | 0.397        | 0.00  | 0.00 | -0.31 | 1.25 | 0.397        |
|            | Using the toilet                  | 0.00  | 0.00 | 0.00  | 0.00 |       | 0.00  | 0.00 | 0.00  | 0.00 |              | 0.00  | 0.00 | 0.00  | 0.00 |              |
|            | Bathing, washing the whole body   | 0.00  | 0.00 | 0.00  | 0.00 |       | 0.00  | 0.00 | 0.00  | 0.00 |              | 0.00  | 0.00 | 0.00  | 0.00 |              |
|            | Moving on flat surfaces           | 0.00  | 0.00 | -0.71 | 1.82 | 0.165 | 0.00  | 0.00 | -0.63 | 1.71 | 0.164        | 0.00  | 0.00 | -0.63 | 1.71 | 0.164        |
|            | Going up and down stairs          | -0.36 | 1.34 | -0.71 | 1.82 | 0.558 | 0.00  | 0.00 | -0.94 | 2.02 | 0.083        | 0.00  | 0.00 | -0.94 | 2.02 | 0.083        |
|            | Dressing and undressing           | 0.00  | 0.00 | 0.00  | 0.00 |       | 0.00  | 0.00 | 0.00  | 0.00 |              | 0.00  | 0.00 | 0.00  | 0.00 |              |
|            | Controlling urine excretion       | 0.00  | 0.00 | 0.00  | 0.00 |       | 0.00  | 0.00 | 0.00  | 0.00 |              | 0.00  | 0.00 | 0.00  | 0.00 |              |
|            | Controlling stool excretion       | 0.00  | 0.00 | 0.00  | 0.00 |       | 0.00  | 0.00 | 0.00  | 0.00 |              | 0.00  | 0.00 | 0.00  | 0.00 |              |
|            | Total Index Barthel               | -0.36 | 1.34 | -3.21 | 5.75 | 0.091 | 0.00  | 0.00 | -3.13 | 5.44 | <b>0.036</b> | 0.00  | 0.00 | -3.13 | 5.44 | <b>0.036</b> |

\*independent samples t-test
